## RESEARCH ARTICLE

# Associations between cardiovascular health and female infertility: A national population-based study

Meiyan Luo<sup>1</sup>, Jianshu Li<sup>2\*</sup>, Xiangjun Xiao<sup>3\*</sup>, Ping Wu<sup>4</sup>, Ya Zhang<sup>5\*</sup>

**1** Department of Obstetrics, The Affiliated Second Hospital, Hengyang Medical School, University of South China, Hengyang, China, **2** Nuclear Industry Health School, The Affiliated Nanhua Hospital, Hengyang Medical School, University of South China, Hengyang, China, **3** Department of Hand & Foot Surgery, The Affiliated Nanhua Hospital, Hengyang Medical School, University of South China, Hengyang, China, **4** Department of Nephrology, The Affiliated Nanhua Hospital, Hengyang Medical School, University of South China, Hengyang, China, **5** Department of Gland Surgery, The Affiliated Nanhua Hospital, Hengyang Medical School, University of South China, Hengyang, China

\* [15575625260@163.com](mailto:15575625260@163.com) (YZ); [3670007@qq.com](mailto:3670007@qq.com) (XX); [ljsnhyy@163.com](mailto:ljsnhyy@163.com) (JL)

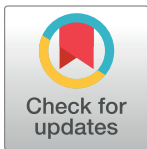

## OPEN ACCESS

**Citation:** Luo M, Li J, Xiao X, Wu P, Zhang Y (2024) Associations between cardiovascular health and female infertility: A national population-based study. PLoS ONE 19(7): e0306476. <https://doi.org/10.1371/journal.pone.0306476>

**Editor:** Gaetano Santulli, Albert Einstein College of Medicine, UNITED STATES

**Received:** January 29, 2024

**Accepted:** June 18, 2024

**Published:** July 5, 2024

**Copyright:** © 2024 Luo et al. This is an open access article distributed under the terms of the [Creative Commons Attribution License](https://creativecommons.org/licenses/by/4.0/), which permits unrestricted use, distribution, and reproduction in any medium, provided the original author and source are credited.

**Data Availability Statement:** Survey data from this study are accessible globally to researchers and data users via the internet at [www.cdc.gov/nchs/nhanes/](http://www.cdc.gov/nchs/nhanes/).

**Funding:** The author(s) received no specific funding for this work.

**Competing interests:** The authors have declared that no competing interests exist.

**Abbreviations:** BMI, Body mass index; CVD, Cardiovascular disease; CVH, Cardiovascular health; DASH, Dietary Approaches to Stop

## Abstract

### Objective

This study investigates the relationship between cardiovascular health (CVH), as quantified by the American Heart Association's Life's Essential 8 (LE8) metric, and female infertility, utilizing data from the National Health and Nutrition Examination Survey (NHANES) spanning 2013–2018.

### Methods

We encompassed females aged 20–49 years and above from the NHANES in this cross-sectional analysis. We assessed CVH using the LE8 score, encompassing eight domains: dietary pattern, physical activity, nicotine exposure, sleep duration, body mass index (BMI), lipid profile, fasting blood glucose, and blood pressure levels. Logistic regression models were applied to explore the association between CVH scores and reported infertility, adjusting for potential confounders including age, race/ethnicity, and socioeconomic status.

### Results

Findings revealed a notable inverse association between CVH scores (per 10 scores) and female infertility [OR = 0.93, 95%CI: 0.90–0.96]. Participants with higher CVH levels were 41% less likely to have female infertility compared to those with lower levels [OR = 0.59, 95% CI: 0.41–0.84]. Higher overall CVH scores, particularly in physical activity, BMI, and blood glucose, were associated with lower odds of infertility. This trend remained consistent across various demographic subgroups.

### Conclusion

Our findings underscore the significance of maintaining optimal cardiovascular health, as evidenced by higher LE8 scores, in mitigating the risk of female infertility. These insights

Hypertension; GAMs, Generalized additive models; HDL-C, high-density lipoprotein cholesterol; LE8, Life's Essential 8; NCHS, National Center for Health Statistics; NHANES, National Health and Nutrition Examination Survey; PCOS, Polycystic ovary syndrome; PIR, Income-to-Poverty Ratio.

advocate for the integration of CVH improvement strategies within the broader framework of reproductive health care, emphasizing the dual benefits of cardiovascular and reproductive health optimization.

## 1. Introduction

Female infertility, affecting an estimated 8–12% of couples globally, presents a complex interplay of factors involving both partners. While male factors contribute to approximately 50% of infertility cases, female factors alone are responsible for 20–30% [1, 2]. Studies have underscored the impact of early-life conditions on reproductive health, with a higher ponderal index at birth being associated with increased risk of infertility in female, suggesting the significance of in-utero development on long-term fertility outcomes [3]. Furthermore, secondary infertility is prevalent worldwide, often linked to infections and reproductive tract issues. The probability of conception decreases with age and duration of non-conception, with a notable decline in female fertility beginning around 25–30 years of age, intensifying after 35 [4].

Emerging evidence links female infertility with cardiovascular diseases (CVD), suggesting that female with infertility may have an increased risk of CVD later in life [5, 6]. For instance, factors like polycystic ovary syndrome (PCOS) and endometriosis, which are associated with infertility, have been observed to correlate with higher rates of CVD risk factors such as hypertension and metabolic syndrome [7]. Elevated levels of triglycerides and lower levels of high-density lipoprotein, markers of cardiovascular risk, have been observed in female with unexplained infertility, indicating a potential for atherogenic lipid profiles in this group [8]. Additionally, female infertility may act as a biomarker for future health risks, with reproductive health intricately tied to overall and long-term health outcomes [9].

The relationship between PCOS and cardiovascular risk illustrates the nuanced nature of this association. While PCOS is commonly associated with metabolic syndrome—a known CVD risk factor—the direct link to primary cardiovascular events such as stroke or myocardial infarction is more speculative. Studies provide mixed results, with some indicating a slight increase in cardiovascular events among female with menstrual irregularity, yet little evidence supports a strong association between hyperparathyroidism and cardiovascular events [10, 11]. This complexity underscores the importance of considering a wide array of reproductive health factors when assessing cardiovascular risk in female.

The American Heart Association's Life's Essential 8 (LE8) score encompasses a broad spectrum of cardiovascular health metrics, from diet and physical activity to blood pressure and blood glucose levels [12, 13]. Understanding how each component of the LE8 score relates to female infertility can provide insights into potential preventative strategies and therapeutic interventions [14].

The primary objective of this study is to elucidate the relationship between cardiovascular health (CVH), as gauged by the LE8 score, and female infertility, leveraging the comprehensive data from the National Health and Nutrition Examination Survey (NHANES).

## 2. Methods

### 2.1 Study population

Our study is based on an original cross-sectional analysis of the NHANES database, which serves as the setting for our research. The NHANES, conducted by the National Center for Health Statistics, is a pivotal program that aims to assess the health and nutritional status of the

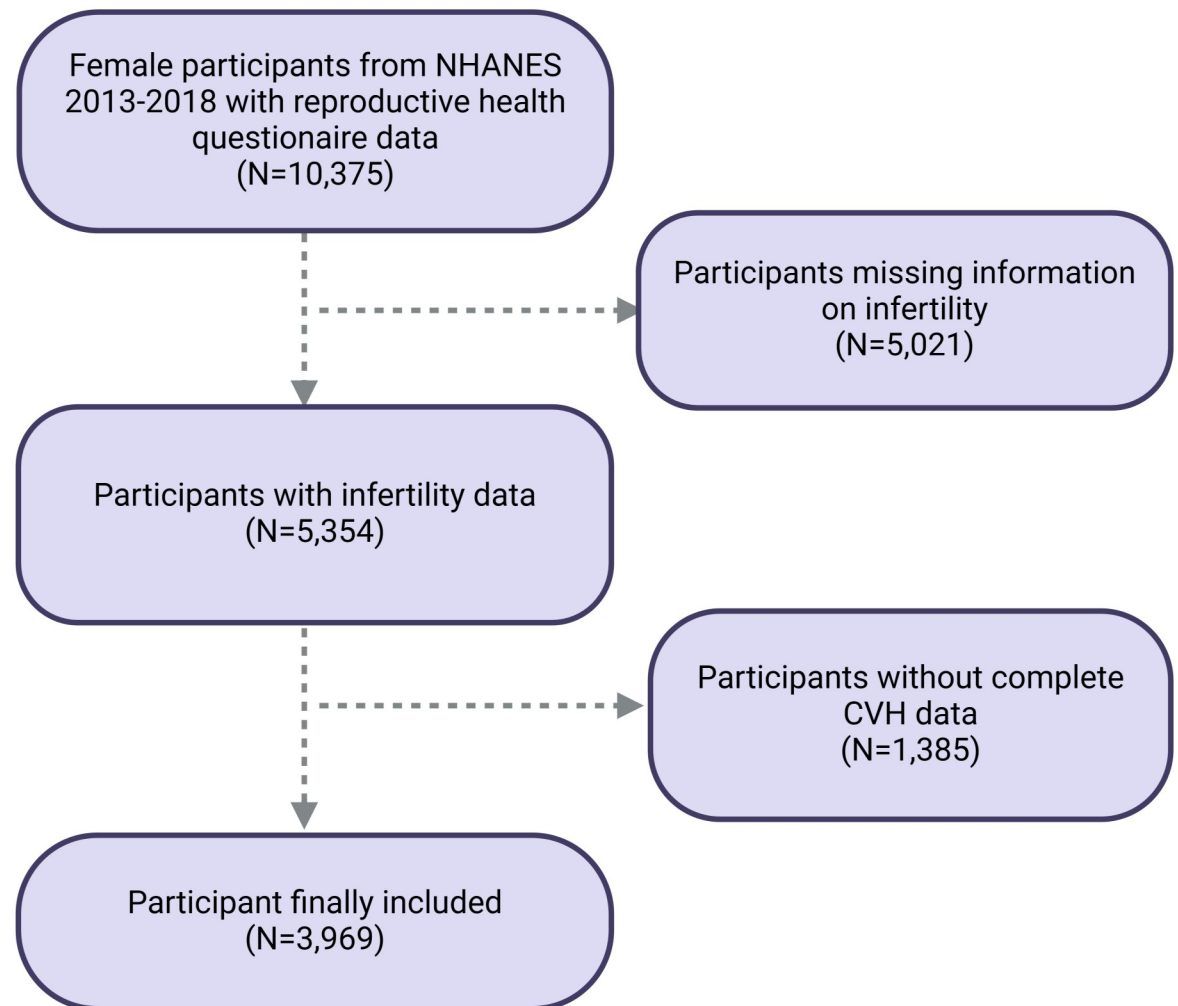

**Fig 1. Flow chart of participant's selection.** NHANES, National Health and Nutrition Examination Survey.

<https://doi.org/10.1371/journal.pone.0306476.g001>

U.S. population [15, 16]. It provides critical data on the prevalence of major diseases and associated risk factors through extensive data collection. NHANES employs sophisticated multi-stage, probability-based sampling methods to ensure a nationally representative sample [17]. The program's protocols have received approval from the National Center for Health Statistics (NCHS) Research Ethics Review Board, and all participants provided written informed consent by NHANES project team. This study utilized data from the 2013–2018 NHANES cycle. The study focused on female participants aged 20 years and older. From the initial pool of 10,375 females in the 2013–2018 cycle with reproductive questionnaire, the study excluded those with missing infertility data ( $n = 5,021$ ), along with participants with missing or incomplete CVH data ( $n = 1,465$ ), resulting in a final sample of 3,969 female participants for analysis (Fig 1).

## 2.2 Definition of infertility, CVH, and covariables

Infertility status was assessed based on responses to two queries (RHQ074 and RHQ076) within the Reproductive Health Questionnaire. RHQ074 inquired if participants had tried to conceive for a year or more without success, and RHQ076 asked if they had ever sought

medical advice for difficulties in becoming pregnant [18, 19]. Affirmative responses to either question classified participants as having infertility. Cardiovascular health is evaluated through the LE8 score, which includes diet (aligned with the Dietary Approaches to Stop Hypertension (DASH) guidelines), physical activity, tobacco use, sleep, body mass index (BMI), lipid levels excluding high-density lipoprotein (HDL), blood glucose, and blood pressure. Standard surveys collect lifestyle data, while physical and biochemical measurements are taken following standardized methods. BMI is calculated as weight in kilograms divided by height in meters squared. Blood pressure is averaged from initial readings, non-HDL cholesterol is obtained by subtracting HDL from total cholesterol, and glycated hemoglobin is determined by liquid chromatography (detailed calculation see S1 Table). The LE8 score ranges from 0 to 100, with an aggregate score derived from these components, categorizing CVH into high, moderate, or low according to American Heart Association benchmarks [20, 21]. The selection of covariates for this study was guided by their potential influence on the connections between infertility and CVH. The covariates included age, race, education level, family income-to-poverty ratio (PIR), age of menarche and pelvic infection disease. The PIR is divided into three categories: low ( $\text{PIR} \leq 1.3$ ), medium ( $\text{PIR} > 1.3\text{--}3.5$ ) and high ( $\text{PIR} > 3.5$ ) [22]. These covariates were chosen based on their established relevance in epidemiological research and their potential confounding effects on the study outcomes [13].

### 2.3 Statistical analysis

The LE 8 score was used to stratify cardiovascular health into three categories: low (scores below 50), intermediate (scores between 50 and 79), and high (scores 80 or above). Percentage distributions were used for categorical data, while continuous data were expressed in terms of means and standard deviations. To compensate for any incomplete data, we utilized the mice package to perform multiple imputation using chained equations with ten imputation sets. The relationship between cardiovascular health status and infertility was investigated through a series of logistic regression models. The initial model did not adjust for additional variables; the second model accounted for age and ethnicity, and the third model further incorporated educational background, PIR, age of menstruation and history of pelvic inflammatory disease. Adjustment for PIR is a continuous variable in all models. Tests for linear trends across three categories of cardiovascular health metrics scores were performed by modeling the median value within each category as a continuous variable. To explore potential non-linear relationships between CVH and infertility, we employed smooth curve fitting techniques using generalized additive models (GAMs). GAMs allow for the flexible modeling of relationships between a predictor and an outcome variable by fitting a smooth curve instead of assuming a linear relationship. This approach is particularly useful for identifying and illustrating complex patterns in the data that might not be evident under linear analysis. The smoothness of the curve is determined by a smoothing parameter, which controls the trade-off between the model's fit and its complexity. We assessed the appropriateness of the curve using the generalized cross-validation score as a criterion for selecting the smoothing parameter [23–25]. Interaction tests were conducted to assess whether the association between CVH and infertility differed across various subgroups, such as age, ethnicity, and socioeconomic status. For this purpose, we introduced interaction terms into our logistic regression models, which represent the product of CVH scores and subgroup identifiers. In addition, the same sensitivity analyses were conducted by restricting the age to the conventional age range for fertility (less than 50 years) to test the robustness of the results. All analyses were performed using the statistical software R, version 4.3.0, with a predetermined significance threshold set at a *P*-value of less than 0.05 for all two-tailed tests.

### 3. Results

#### 3.1 Baseline characteristics

A total of 3,969 female participants with a mean age of  $39.97 \pm 11.42$  years were included in this analysis, of which 476 (11.99%) were diagnosed with infertility. The mean LE8 score with its standard deviation (SD) was 66.76 (11.32). Of note, 16.00% had poor CVH ( $LE8 < 50$ ), 60.07% had moderate CVH ( $50 \leq LE8 < 80$ ), and 23.94% were classified as having high CVH ( $LE8 \geq 80$ ). Participants with higher CVH scores had a lower prevalence of infertility compared to those with lower CVH scores (10.11% vs. 15.28%). In addition, participants with higher CVH scores were more likely to be younger and have older menarche, have high proportion of married or living with partner, have higher socioeconomic status (level of education and family income), and have a lower prevalence of diabetes mellitus and pelvic infection disease ( $P < 0.01$ ) (Table 1). Characteristics of the participants aged 20–49 years are presented in S2 Table, and the results are generally consistent.

#### 3.2 Association between CVH and infertility

Table 2 demonstrates the association of CVH score and its 8 subscores with infertility. In all models, there was an inverse association between total CVH score and infertility, with each 10-point increase in CVH associated with 7% lower odds of infertility after adjusting for all covariates [OR = 0.93, 95% CI: 0.90–0.96]. Participants with moderate CVH [OR = 0.76, 95% CI: 0.58–1.00] and higher CVH levels [OR = 0.59, 95% CI: 0.41–0.84] had 24% and 41% lower odds of infertility compared with the low CVH group, and there was a significant linear trend ( $P$  for trend  $< 0.01$ ). For the association of the 8 subscores with infertility, also in the fully adjusted model, our results showed that it was mainly 3 of the subscores (physical activity score, body mass index score, and blood glucose score) that maintained a statistically significant negative association with infertility ( $P < 0.05$ ). Associations for participants aged 20–49 years are presented in S3 Table, with generally consistent results. The dose-response relationship between LE8 score and infertility was assessed using smooth curve fitting. A negative association between LE8 score and infertility was observed in the fully adjusted model, but the non-linear relationship was not significant (total  $P$  value  $< 0.001$ , non-linear  $P$ -value = 0.793) (Fig 2).

**3.2.1 Subgroup analyses.** Subgroup analyses based on different groups further demonstrated the robustness of the association between CVH and infertility across populations (Table 3). The results showed that the association between CVH and infertility was generally consistent across participants of different age, marital status, education, PIR, and diabetes status, all of which were inversely associated and not significantly different (all  $P$  for interaction  $> 0.05$ ). The results of the subgroup analyses for participants aged 20–49 years are presented in S4 Table.

### 4. Discussion

Our study involving 3,969 representative female participants showed associations between a comprehensive cardiovascular health indicator (CVH scores) and female infertility. Our results suggest that higher CVH levels are associated with a lower prevalence of infertility, especially significant in the CVH subscores corresponding to the three metrics of physical activity, BMI, and blood glucose. These results suggest that managing health behaviours and health factors to maintain high levels of cardiovascular health may be important in reducing the prevalence of infertility in female.

**Table 1. Baseline characteristics of participants with CVH categories from LE8 score.**

| Characteristics                      | Low (LE8 <50) | Moderate(50≤LE8 <80) | High (LE8 ≥80) | P-value |
|--------------------------------------|---------------|----------------------|----------------|---------|
| No. of participants in sample        | 635           | 2,384                | 950            |         |
| Age, y (SD)                          | 45.26 ± 10.32 | 40.13 ± 11.33        | 36.03 ± 10.84  | <0.001  |
| Age of menarche, y (SD)              | 12.30 ± 1.84  | 12.55 ± 1.78         | 12.92 ± 1.75   | <0.001  |
| PIR                                  | 1.75 ± 1.33   | 2.41 ± 1.60          | 3.21 ± 1.66    |         |
| Race/ethnicity, n (%)                |               |                      |                | <0.001  |
| Mexican American                     | 89 (14.02)    | 423 (17.74)          | 121 (12.74)    |         |
| Others                               | 48 (7.56)     | 250 (10.49)          | 112 (11.79)    |         |
| Non-Hispanic White                   | 272 (42.83)   | 781 (32.76)          | 394 (41.47)    |         |
| Non-Hispanic Black                   | 174 (27.40)   | 567 (23.78)          | 97 (10.21)     |         |
| Other Hispanic                       | 52 (8.19)     | 363 (15.23)          | 226 (23.79)    |         |
| Marital status, %                    |               |                      |                | <0.001  |
| Married/Living with partner          | 284 (44.72)   | 1,177 (49.37)        | 521 (54.85)    |         |
| Living alone                         | 351 (55.28)   | 1,207 (50.63)        | 429 (45.15)    |         |
| Education level, %                   |               |                      |                | <0.001  |
| Less than high school                | 162 (25.49)   | 358 (15.03)          | 55 (5.83)      |         |
| High school                          | 203 (32.02)   | 577 (24.22)          | 112 (11.77)    |         |
| More than high school                | 270 (42.49)   | 1,449 (60.75)        | 783 (82.40)    |         |
| Diabetes, %                          |               |                      |                | <0.001  |
| Yes                                  | 225 (35.44)   | 295 (12.39)          | 28 (2.94)      |         |
| No                                   | 410 (64.56)   | 2,089 (87.61)        | 922 (97.06)    |         |
| Pelvic infection disease, %          |               |                      |                | <0.001  |
| Yes                                  | 65 (10.24)    | 143 (6.00)           | 25 (2.63)      |         |
| No                                   | 570 (89.76)   | 2,241 (94.00)        | 925 (97.37)    |         |
| Infertility, %                       |               |                      |                | 0.008   |
| Yes                                  | 97 (15.28)    | 283 (11.87)          | 96 (10.11)     |         |
| No                                   | 538 (84.72)   | 2,101 (88.13)        | 854 (89.81)    |         |
| AHA LE8 score (SD)                   |               |                      |                |         |
| Mean total CVH score                 | 41.31 ± 6.78  | 65.18 ± 8.20         | 87.86 ± 5.40   | <0.001  |
| Mean DASH diet score                 | 23.57 ± 26.14 | 38.62 ± 30.89        | 65.18 ± 28.87  | <0.001  |
| Mean physical activity score         | 9.54 ± 26.46  | 41.27 ± 45.89        | 88.59 ± 27.32  | <0.001  |
| Mean tobacco/nicotine exposure score | 41.05 ± 40.23 | 72.46 ± 37.24        | 91.71 ± 19.65  | <0.001  |
| Mean sleep health score              | 67.20 ± 29.84 | 82.61 ± 24.53        | 91.39 ± 16.65  | <0.001  |
| Mean body mass index score           | 25.53 ± 28.31 | 52.04 ± 35.36        | 85.48 ± 23.53  | <0.001  |
| Mean blood lipid score               | 49.76 ± 31.46 | 72.05 ± 28.95        | 89.20 ± 20.16  | <0.001  |
| Mean blood glucose score             | 63.57 ± 31.66 | 86.17 ± 22.83        | 97.98 ± 8.91   | <0.001  |
| Mean blood pressure score            | 50.28 ± 30.62 | 76.21 ± 28.21        | 93.35 ± 15.46  | <0.001  |

Mean (SD) for continuous variables: the P value was calculated by the weighted linear regression model.

Percentages for categorical variables: the P value was calculated by the weighted chi-square test.

Cardiovascular health (CVH) is categorized into 3 grades, low: LE8 score <50, moderate: 50≤LE8 score <80, high: LE8 score ≥80.

Abbreviation: AHA, American Heart Association; LE8, Life's Essential 8; CVH, cardiovascular health; DASH, Dietary Approaches to Stop Hypertension; PIR, The ratio of family income to poverty.

<https://doi.org/10.1371/journal.pone.0306476.t001>

#### 4.1 Comparison with previous studies

In our subgroup analysis, we observed that the upper limit of the confidence interval for the association between higher overall CVH scores, particularly for physical activity, BMI and blood glucose, and the odds of infertility was almost 1. This suggests that although there

**Table 2. The associations between the Life's Essential 8 cardiovascular health (CVH) score and infertility.**

| LE8/CVH                                    | Model 1 [OR (95% CI)] | Model 2 [OR (95% CI)] | Model 3 [OR (95% CI)] |
|--------------------------------------------|-----------------------|-----------------------|-----------------------|
| <b>Total CVH score (per 10 scores)</b>     | 0.87 (0.83, 0.91)     | 0.89 (0.85, 0.93)     | 0.93 (0.90, 0.96)     |
| CVH categories                             |                       |                       |                       |
| Low (LE8 <50)                              | Ref.                  | Ref.                  | Ref.                  |
| Moderate (50 ≤ LE8 <80)                    | 0.75 (0.58, 0.96)     | 0.82 (0.63, 1.06)     | 0.76 (0.58, 1.00)     |
| High (LE8 ≥80)                             | 0.62 (0.46, 0.84)     | 0.70 (0.51, 0.96)     | 0.59 (0.41, 0.84)     |
| P for trend                                | <0.001                | <0.001                | <0.001                |
| <b>Subclass CVH scores (per 10 scores)</b> |                       |                       |                       |
| Mean DASH diet score                       | 0.96 (0.91, 1.01)     | 0.97 (0.92, 1.02)     | 0.97 (0.92, 1.01)     |
| Mean physical activity score               | 0.95 (0.90, 1.00)     | 0.95 (0.89, 1.00)     | 0.95 (0.91, 0.99)     |
| Mean tobacco/nicotine exposure score       | 0.92 (0.83, 1.01)     | 0.93 (0.83, 1.02)     | 0.93 (0.83, 1.02)     |
| Mean sleep health score                    | 0.96 (0.92, 1.01)     | 0.97 (0.93, 1.01)     | 0.97 (0.93, 1.02)     |
| Mean body mass index score                 | 0.93 (0.87, 0.98)     | 0.94 (0.89, 0.99)     | 0.94 (0.89, 0.99)     |
| Mean blood lipid score                     | 0.97 (0.93, 1.01)     | 0.98 (0.94, 1.02)     | 0.98 (0.94, 1.02)     |
| Mean blood glucose score                   | 0.93 (0.88, 0.98)     | 0.92 (0.87, 0.99)     | 0.92 (0.87, 0.99)     |
| Mean blood pressure score                  | 0.96 (0.91, 1.01)     | 0.96 (0.90, 1.02)     | 0.96 (0.91, 1.02)     |

Model 1 was unadjusted for covariates; Model 2 enhanced Model 1 by including age and ethnicity; and Model 3 further augmented Model 2 by integrating education level, family income-to-poverty ratio, marital status, age of menarche and pelvic infection disease. Abbreviation: CVH, cardiovascular health; DASH, Dietary Approaches to Stop Hypertension.

\*Tests for linear trends across three categories of cardiovascular health metrics scores were performed by modeling the median value within each category as a continuous variable

<https://doi.org/10.1371/journal.pone.0306476.t002>

appears to be a trend towards lower odds of infertility with higher CVH scores, the association may not be as robust as reported. It's important to interpret these findings with caution, given the potential for overestimation of the effect due to the proximity of the confidence interval to 1. This observation calls for further investigation into the specific components of CVH and their direct or indirect influence on female fertility outcomes.

To our knowledge, this is the first study to investigate the association of CVH levels assessed by LE8 with female infertility. Few previous studies have investigated whether there is an association between overall cardiovascular fitness levels and female infertility, and a recent Project Viva-based prospective study, also from the United States, investigated whether there was a difference in total CVH scores at midlife between those with and without a history of infertility in 468 female participants. The results showed that female with infertility had a 2.94-point lower CVH score compared with those without a history of infertility, which reinforces the reliability of our results in another way [26]. More studies have investigated the relationship between CVD and infertility, and these studies have found a variety of different CVD outcomes associated with infertility, although there are some differences in endpoint definitions from study to study [27]. Studies have shown that conditions like PCOS and endometriosis, often associated with infertility, are linked to a higher risk of cardiovascular diseases. Female with these conditions are more likely to develop CVD risk factors such as hypertension and metabolic syndrome. This link suggests that infertility in female may be an indicator of broader health issues, including an increased risk of CVD [28]. A study focusing on the predictive value of female infertility for early cardiovascular disease found no increased risk of early CVD during a follow-up period. This suggests that the direct predictive value of infertility for

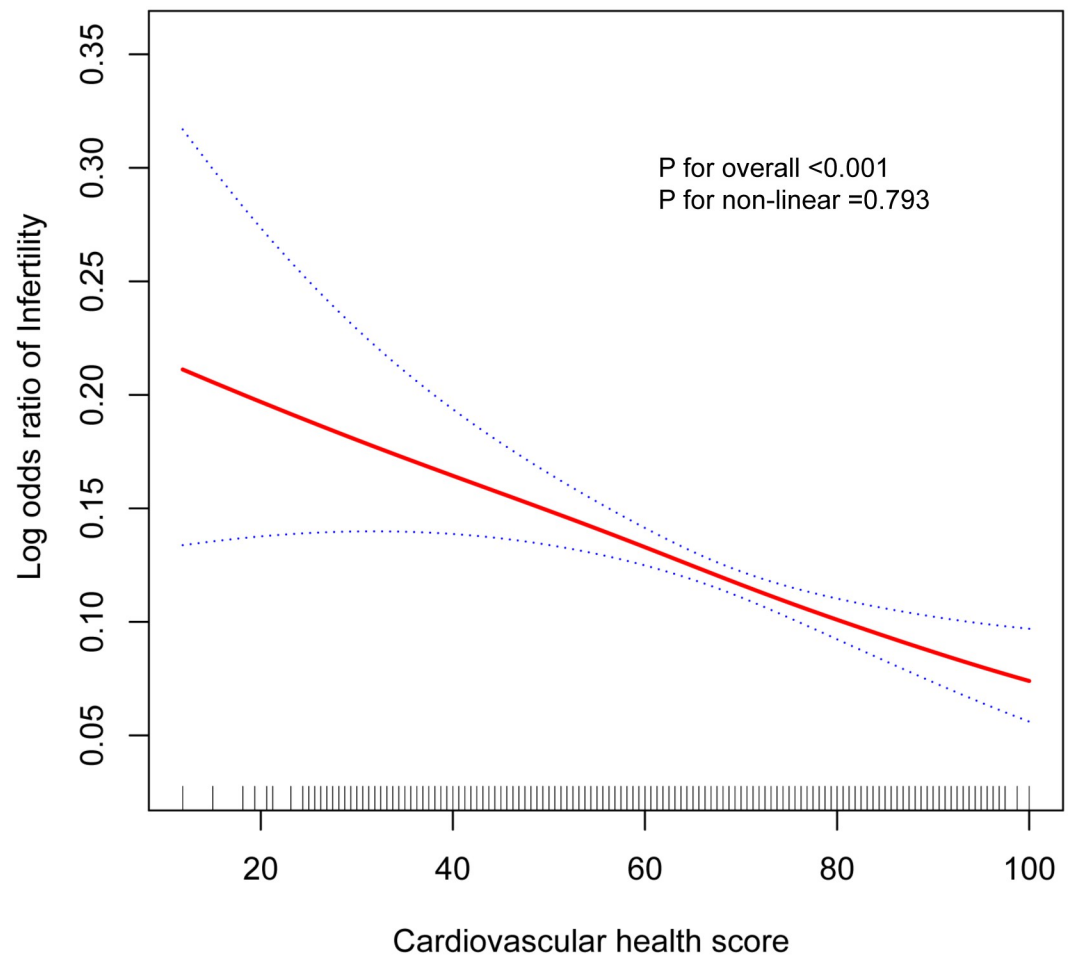

**Fig 2. The association between total CVH score and infertility.** The solid red line represents the smooth curve fit between variables. Blue bands represent the 95% of confidence interval from the fit.

<https://doi.org/10.1371/journal.pone.0306476.g002>

CVD risk might not be as straightforward as previously thought [29]. There is evidence that cardiovascular risk factors present during childhood and adolescence, such as elevated LDL and total cholesterol, may be associated with adult subfertility [30]. This supports the notion that early-life cardiovascular health could influence reproductive outcomes. These findings collectively indicate a complex and multifaceted relationship between cardiovascular diseases and female infertility, emphasizing the need for a holistic approach to female's health that considers both reproductive and cardiovascular aspects.

#### 4.2 Potential biological mechanisms

In discussing the mechanisms underlying the negative association between CVH and female infertility, it is crucial to understand the multifaceted impact of the components of CVH on reproductive health. Physical activity emerges as a key factor, where regular exercise has been shown to enhance hormonal balance, reduce oxidative stress, and improve endothelial function, all of which are vital for maintaining regular ovulation and healthy reproductive organs [31, 32]. BMI plays another critical role, with high BMI often linked to hormonal imbalances and ovulatory dysfunction, conditions contributing to infertility. Obesity can lead to PCOS, a



**Table 3. Subgroup analysis of the associations of Life's Essential 8 cardiovascular health (CVH) score (per 10 scores) and infertility.**

| Subgroup                    | OR (95%CI)        | P for interaction |
|-----------------------------|-------------------|-------------------|
| <b>Age</b>                  |                   | 0.205             |
| < 40 years                  | 0.88 (0.81, 0.95) |                   |
| ≥ 40 years                  | 0.92 (0.85, 1.00) |                   |
| <b>Marital status</b>       |                   | 0.432             |
| Married/Living with partner | 0.95 (0.90, 1.00) |                   |
| Living alone                | 0.91 (0.86, 0.96) |                   |
| <b>PIR</b>                  |                   | 0.287             |
| < 1.3                       | 0.89 (0.79, 0.99) |                   |
| 1.3–3.5                     | 0.94 (0.88, 1.00) |                   |
| >3.5                        | 0.93 (0.88, 1.01) |                   |
| <b>Education level</b>      |                   | 0.540             |
| Less than high school       | 0.84 (0.74, 0.94) |                   |
| High school                 | 0.90 (0.83, 0.97) |                   |
| More than high school       | 0.91 (0.82, 0.99) |                   |
| <b>Diabetes</b>             |                   | 0.391             |
| Yes                         | 0.85 (0.74, 0.96) |                   |
| No                          | 0.93 (0.90, 0.97) |                   |

Age, race, education level, family income-to-poverty ratio, marital status, age of menarche and pelvic infection disease were adjusted. Abbreviation: CVH, cardiovascular health.

<https://doi.org/10.1371/journal.pone.0306476.t003>

prevalent cause of infertility [33]. Moreover, blood glucose levels are intrinsically linked to reproductive health. Elevated blood glucose can lead to insulin resistance, a condition frequently associated with PCOS and subsequent infertility. This insulin resistance disrupts ovulation and adversely affects the quality of oocytes and embryos [34, 35]. Beyond these, other aspects of CVH also contribute to fertility. Poor dietary habits can lead to nutrient deficiencies affecting reproductive health [36]. Tobacco use is linked to reduced ovarian function and oocyte quality [19]. Inadequate sleep can disrupt hormonal rhythms, influencing fertility [37]. Dyslipidemia impacts hormone production and increases the risk of ovulatory dysfunction [38], and hypertension can impair uterine and ovarian blood flow [39]. These findings underscore a complex interplay between various components of CVH and female reproductive health, suggesting that the pathway to improving fertility might well lie in enhancing overall cardiovascular health.

### 4.3 Strengths and limitations

Our study's strength primarily lies in leveraging the NHANES database, renowned for its sophisticated multi-stage, probability-based sampling method. This methodology enhances the representativeness of our findings across the diverse spectrum of the U.S. female population. Additionally, our comprehensive evaluation of cardiovascular health (CVH) through the Life's Essential 8 (LE8) score provides an in-depth analysis of the multifaceted aspects of cardiovascular health and their potential implications on female infertility. Such an approach yields significant insights into how various components of CVH might influence reproductive outcomes. Despite these strengths, we acknowledge several limitations that merit consideration. The cross-sectional nature of our study inherently limits our capacity to establish causality from the observed associations between CVH components and female infertility. Although

these associations are indicative of potential relationships, longitudinal studies are essential to confirm causation and elucidate the directional dynamics of these relationships. Moreover, while we have made efforts to adjust for a wide range of confounders, the potential for residual confounding exists. Given the intricate interplay between infertility and cardiovascular health, other unmeasured factors not accounted for in our study could influence the observed associations. This underscores the complexity of disentangling the web of factors impacting both infertility and CVH [40, 41]. A notable limitation is our reliance on self-reported data, particularly concerning infertility status and some CVH components. This reliance introduces the possibility of reporting bias, where the accuracy of self-reported information can vary, potentially impacting the validity of our conclusions. Future studies would benefit from incorporating more objective measures of infertility and CVH to mitigate this limitation [42, 43]. While our study capitalizes on the robust and nationally representative NHANES database to explore the association between cardiovascular health and female infertility, an important limitation to note is the selection of 3,969 female participants from an initial pool of 10,375. This selection was necessitated by the availability of complete data on infertility status and CVH components. We recognize that this reduction in sample size might influence the generalizability of our findings. Specifically, the exclusion of participants due to missing data could introduce selection bias, potentially affecting the representativeness of our study population relative to the broader U.S. female population. This limitation underscores the challenge of relying on self-reported data and the potential for non-response bias. Future research could benefit from strategies aimed at minimizing data missingness and employing multiple imputation techniques to better account for participants with incomplete data. Despite this limitation, our analysis provides valuable insights into the relationship between cardiovascular health and female infertility within the context of the available data. We remain cautious in interpreting our findings, acknowledging that the associations observed may not fully represent the underlying dynamics in the entire NHANES. Furthermore, our study's focus on the U.S. population means that certain demographic and ethnic groups worldwide may not be adequately represented in our findings. Variations in lifestyle, access to healthcare, and prevalence of cardiovascular risk factors can impact the relationship between CVH and infertility in diverse populations. For instance, dietary habits, physical activity levels, and exposure to environmental pollutants, which are known to influence both CVH and reproductive health, vary widely across different societies.

## 5. Conclusion

Our study reveals a significant inverse association between cardiovascular health, as indicated by the LE8 score, and female infertility. This underscores the importance of maintaining optimal cardiovascular health for improving reproductive outcomes in female, highlighting a need for integrated health strategies that focus on both cardiovascular and reproductive wellness.

## Supporting information

**S1 Table. Definition and scoring approach for quantifying cardiovascular health, as per the American Heart Association's Life's Essential 8 score, and as applied in the National Health and Nutrition Examination Surveys.**

(PDF)

**S2 Table. Baseline characteristics of participants (age < 50 years) with CVH categories from LE8 score.**

(DOC)

**S3 Table. The associations between the Life's Essential 8 cardiovascular health (CVH) score and infertility.**

(DOC)

**S4 Table. Subgroup analysis of the associations of Life's Essential 8 cardiovascular health (CVH) score (per 10 scores) and infertility.**

(DOC)

## Author Contributions

**Conceptualization:** Meiyang Luo, Jianshu Li, Xiangjun Xiao, Ping Wu, Ya Zhang.

**Data curation:** Meiyang Luo, Jianshu Li, Xiangjun Xiao, Ping Wu, Ya Zhang.

**Formal analysis:** Meiyang Luo, Jianshu Li, Ping Wu, Ya Zhang.

**Funding acquisition:** Meiyang Luo, Jianshu Li, Xiangjun Xiao, Ya Zhang.

**Investigation:** Meiyang Luo, Jianshu Li, Ya Zhang.

**Methodology:** Meiyang Luo, Ya Zhang.

**Project administration:** Meiyang Luo, Ping Wu, Ya Zhang.

**Resources:** Meiyang Luo, Jianshu Li, Ping Wu, Ya Zhang.

**Software:** Meiyang Luo, Jianshu Li, Xiangjun Xiao, Ping Wu, Ya Zhang.

**Supervision:** Meiyang Luo, Jianshu Li, Ping Wu, Ya Zhang.

**Validation:** Meiyang Luo, Xiangjun Xiao, Ping Wu, Ya Zhang.

**Visualization:** Meiyang Luo, Xiangjun Xiao, Ping Wu, Ya Zhang.

**Writing – original draft:** Meiyang Luo, Ya Zhang.

**Writing – review & editing:** Meiyang Luo, Jianshu Li, Xiangjun Xiao, Ping Wu, Ya Zhang.

## References

1. Dong L, Teh DBL, Kennedy BK, Huang Z: Unraveling female reproductive senescence to enhance healthy longevity. *Cell Res* 2023, 33(1):11–29. <https://doi.org/10.1038/s41422-022-00718-7> PMID: 36588114
2. Jimbo M, Kunisaki J, Ghaed M, Yu V, Flores HA, Hotaling JM: Fertility in the aging male: a systematic review. *Fertil Steril* 2022, 118(6):1022–1034. <https://doi.org/10.1016/j.fertnstert.2022.10.035> PMID: 36509505
3. Dupont C, Hulot A, Jaffrezic F, Faure C, Czernichow S, di Clemente N, et al: Female ponderal index at birth and idiopathic infertility. *J Dev Orig Health Dis* 2020, 11(2):154–158. <https://doi.org/10.1017/S2040174419000394> PMID: 31309911
4. Vander Borghet M, Wyns C: Fertility and infertility: Definition and epidemiology. *Clin Biochem* 2018, 62:2–10. <https://doi.org/10.1016/j.clinbiochem.2018.03.012> PMID: 29555319
5. Guan C, Zahid S, Minhas AS, Ouyang P, Vaught A, Baker VL, et al: Polycystic ovary syndrome: a "risk-enhancing" factor for cardiovascular disease. *Fertil Steril* 2022, 117(5):924–935. <https://doi.org/10.1016/j.fertnstert.2022.03.009> PMID: 35512976
6. Smith J, Velez MP, Dayan N: Infertility, Infertility Treatment, and Cardiovascular Disease: An Overview. *Can J Cardiol* 2021, 37(12):1959–1968. <https://doi.org/10.1016/j.cjca.2021.09.002> PMID: 34534621
7. Kolhe JV, Chhipa AS, Butani S, Chavda V, Patel SS: PCOS and Depression: Common Links and Potential Targets. *Reprod Sci* 2022, 29(11):3106–3123. <https://doi.org/10.1007/s43032-021-00765-2> PMID: 34642910
8. Verit FF, Yildiz Zeyrek F, Zebitay AG, Akyol H: Cardiovascular risk may be increased in women with unexplained infertility. *Clin Exp Reprod Med* 2017, 44(1):28–32. <https://doi.org/10.5653/ceerm.2017.44.1.28> PMID: 28428941

9. Cedars MI, Taymans SE, DePaolo LV, Warner L, Moss SB, Eisenberg ML: The sixth vital sign: what reproduction tells us about overall health. Proceedings from a NICHD/CDC workshop. *Hum Reprod Open* 2017, 2017(2):hox008. <https://doi.org/10.1093/hropen/hox008> PMID: 30895226
10. Legro RS: Polycystic Ovary Syndrome and Cardiovascular Disease: A Premature Association? *Endocr Rev* 2003, 24(3):302–312. <https://doi.org/10.1210/er.2003-0004> PMID: 12788801
11. Osibogun O, Ogunmoroti O, Michos ED: Polycystic ovary syndrome and cardiometabolic risk: Opportunities for cardiovascular disease prevention. *Trends Cardiovasc Med* 2020, 30(7):399–404. <https://doi.org/10.1016/j.tcm.2019.08.010> PMID: 31519403
12. Zhang J, Chen G, Habudele Z, Wang X, Cai M, Li H, et al: Relation of Life's Essential 8 to the Genetic Predisposition for Cardiovascular Outcomes and All-cause Mortality: Results from a National Prospective Cohort. *Eur J Prev Cardiol* 2023.
13. Xie R, Liu L, Liu C, Xie S, Huang X, Zhang Y: Associations of ethylene oxide exposure and "Life's Essential 8". *Environ Sci Pollut Res Int* 2023. <https://doi.org/10.1007/s11356-023-30741-z> PMID: 37950781
14. Kurabayashi T, Mizunuma H, Kubota T, Hayashi K: Ovarian infertility is associated with cardiovascular disease risk factors in later life: A Japanese cross-sectional study. *Maturitas* 2016, 83:33–39. <https://doi.org/10.1016/j.maturitas.2015.08.015> PMID: 26417693
15. Xie R, Xiao M, Li L, Ma N, Liu M, Huang X, et al: Association between SII and hepatic steatosis and liver fibrosis: A population-based study. *Front Immunol* 2022, 13:925690. <https://doi.org/10.3389/fimmu.2022.925690> PMID: 36189280
16. Xie R, Liu M: Relationship Between Non-Alcoholic Fatty Liver Disease and Degree of Hepatic Steatosis and Bone Mineral Density. *Front Endocrinol (Lausanne)* 2022, 13:857110. <https://doi.org/10.3389/fendo.2022.857110> PMID: 35360054
17. Xie R, Ning Z, Xiao M, Li L, Liu M, Zhang Y: Dietary inflammatory potential and biological aging among US adults: a population-based study. *Aging Clin Exp Res* 2023, 35(6):1273–1281. <https://doi.org/10.1007/s40520-023-02410-1> PMID: 37186209
18. Yin YH, Zhou SY, Lu DF, Chen XP, Liu B, Lu S, et al: Higher waist circumference is associated with increased likelihood of female infertility: NHANES 2017–2020 results. *Front Endocrinol (Lausanne)* 2023, 14:1216413. <https://doi.org/10.3389/fendo.2023.1216413> PMID: 37937052
19. He S, Wan L: Associations between smoking status and infertility: a cross-sectional analysis among USA women aged 18–45 years. *Front Endocrinol (Lausanne)* 2023, 14:1140739. <https://doi.org/10.3389/fendo.2023.1140739> PMID: 37181041
20. Ma H, Wang X, Xue Q, Li X, Liang Z, Heianza Y, et al: Cardiovascular Health and Life Expectancy Among Adults in the United States. *Circulation* 2023, 147(15):1137–1146. <https://doi.org/10.1161/CIRCULATIONAHA.122.062457> PMID: 37036905
21. Mahemuti N, Zou J, Liu C, Xiao Z, Liang F, Yang X: Urinary Albumin-to-Creatinine Ratio in Normal Range, Cardiovascular Health, and All-Cause Mortality. *JAMA Netw Open* 2023, 6(12):e2348333. <https://doi.org/10.1001/jamanetworkopen.2023.48333> PMID: 38113044
22. Setiono FJ, Guerra LA, Leung C, Leak TM: Sociodemographic characteristics are associated with prevalence of high-risk waist circumference and high-risk waist-to-height ratio in U.S. adolescents. *BMC Pediatr* 2021, 21(1):215. <https://doi.org/10.1186/s12887-021-02685-1> PMID: 33941130
23. Xie R, Liu X, Wu H, Liu M, Zhang Y: Associations between systemic immune-inflammation index and abdominal aortic calcification: Results of a nationwide survey. *Nutr Metab Cardiovasc Dis* 2023, 33(7):1437–1443. <https://doi.org/10.1016/j.numecd.2023.04.015> PMID: 37156667
24. Zhang Y, Liu M, Xie R: Associations between cadmium exposure and whole-body aging: mediation analysis in the NHANES. *BMC Public Health* 2023, 23(1):1675. <https://doi.org/10.1186/s12889-023-16643-2> PMID: 37653508
25. Zhang Y, Wu H, Li C, Liu C, Liu M, Liu X, et al: Associations between weight-adjusted waist index and bone mineral density: results of a nationwide survey. *BMC Endocr Disord* 2023, 23(1):162. <https://doi.org/10.1186/s12902-023-01418-y> PMID: 37537589
26. Nichols AR, Rifas-Shiman SL, Switkowski KM, Zhang M, Young JG, Hivert MF, et al: History of Infertility and Midlife Cardiovascular Health in Female Individuals. *JAMA Netw Open* 2024, 7(1):e2350424. <https://doi.org/10.1001/jamanetworkopen.2023.50424> PMID: 38180761
27. Bosdou JK, Anagnostis P, Lainas GT, Kolibianakis EM: Female Infertility and Cardiovascular Risk—A Hype or an Underestimated Reality? *Curr Pharm Des* 2020, 26(43):5551–5555. <https://doi.org/10.2174/1381612826666200821114552> PMID: 32954997
28. Hanson B, Johnstone E, Dorais J, Silver B, Peterson CM, Hotaling J: Female infertility, infertility-associated diagnoses, and comorbidities: a review. *J Assist Reprod Genet* 2017, 34(2):167–177. <https://doi.org/10.1007/s10815-016-0836-8> PMID: 27817040

29. Bungum AB, Glazer CH, Arendt LH, Schmidt L, Pinborg A, Bonde JP, et al: Risk of hospitalization for early onset of cardiovascular disease among infertile women: a register-based cohort study. *Hum Reprod* 2019, 34(11):2274–2281. <https://doi.org/10.1093/humrep/dez154> PMID: 31665298
30. Wang Y, Xiong X, Bazzano L, Harville EW: Childhood cardiovascular health and subfertility: the Bogalusa Heart Study. *Pediatr Res* 2018, 84(5):625–631. <https://doi.org/10.1038/s41390-018-0032-x> PMID: 29899387
31. Lakoski SG, Barlow CE, Farrell SW, Berry JD, Morrow JR Jr., Haskell WL: Impact of body mass index, physical activity, and other clinical factors on cardiorespiratory fitness (from the Cooper Center longitudinal study). *Am J Cardiol* 2011, 108(1):34–39. <https://doi.org/10.1016/j.amjcard.2011.02.338> PMID: 21529738
32. Gooding HC, Milliren C, Shay CM, Richmond TK, Field AE, Gillman MW: Achieving Cardiovascular Health in Young Adulthood-Which Adolescent Factors Matter? *J Adolesc Health* 2016, 58(1):119–121. <https://doi.org/10.1016/j.jadohealth.2015.09.011> PMID: 26707234
33. Mahalingaiah S, Sun F, Cheng JJ, Chow ET, Lunetta KL, Murabito JM: Cardiovascular risk factors among women with self-reported infertility. *Fertil Res Pract* 2017, 3:7. <https://doi.org/10.1186/s40738-017-0034-0> PMID: 28620545
34. Deng C, Zhang Z, Li H, Bai P, Cao X, Dobs AS: Analysis of cardiovascular risk factors associated with serum testosterone levels according to the US 2011–2012 National Health and Nutrition Examination Survey. *Aging Male* 2019, 22(2):121–128. <https://doi.org/10.1080/13685538.2018.1479387> PMID: 29925274
35. Rahmani F, Asgari S, Khalili D, Habibi Moeini AS, Tohidi M, Azizi F, et al: National trends in cardiovascular health metrics among Iranian adults using results of three cross-sectional STEPwise approaches to surveillance surveys. *Sci Rep* 2021, 11(1):58. <https://doi.org/10.1038/s41598-020-79322-x> PMID: 33420115
36. van Elten TM, van de Beek C, Geelen A, Gemke R, Groen H, Hoek A, et al: Preconception Lifestyle and Cardiovascular Health in the Offspring of Overweight and Obese Women. *Nutrients* 2019, 11(10). <https://doi.org/10.3390/nu11102446> PMID: 31615021
37. Gençtürk N, Yıldız Karaahmet A, Shafaati Laleh S, Guksu Z: The relationship between infertility and sleep quality in women: Systematic review and meta-analysis. *Actas Urol Esp (Engl Ed)* 2023. <https://doi.org/10.1016/j.acuroe.2023.12.002> PMID: 38160793
38. Yang T, Zhao J, Liu F, Li Y: Lipid metabolism and endometrial receptivity. *Hum Reprod Update* 2022, 28(6):858–889. <https://doi.org/10.1093/humupd/dmac026> PMID: 35639910
39. O'Kelly AC, Michos ED, Shufelt CL, Vermunt JV, Minissian MB, Quesada O, et al: Pregnancy and Reproductive Risk Factors for Cardiovascular Disease in Women. *Circ Res* 2022, 130(4):652–672. <https://doi.org/10.1161/CIRCRESAHA.121.319895> PMID: 35175837
40. Xie R, Zhang Y: Index-based calculation or Transient Elastography to assess the degree of hepatic steatosis and fibrosis. *J Nutr* 2023, 153(3):909. <https://doi.org/10.1016/j.tjnut.2022.10.015> PMID: 36774231
41. Xie R, Zhang Y, Yan T, Huang X, Xie S, Liu C, et al: Relationship between nonalcoholic fatty liver disease and bone mineral density in adolescents. *Medicine (Baltimore)* 2022, 101(41):e31164. <https://doi.org/10.1097/MD.00000000000031164> PMID: 36253982
42. Xie R, Zhang Y: Association between 19 dietary fatty acids intake and rheumatoid arthritis: Results of a nationwide survey. *Prostaglandins Leukot Essent Fatty Acids* 2023, 188. <https://doi.org/10.1016/j.plefa.2022.102530> PMID: 36586398.
43. Xie R, Zhang Y: Associations between dietary flavonoid intake with hepatic steatosis and fibrosis quantified by VCTE: Evidence from NHANES and FNDDS. *Nutr Metab Cardiovasc Dis* 2023, 33(6):1179–1189. <https://doi.org/10.1016/j.numecd.2023.03.005> PMID: 36964061
